# Supplementary material for: Bio-polysaccharide electrolyte gated photoelectric synergic coupled oxide neuromorphic transistor with Pavlovian activities
Source: Royal Society of Chemistry journal article supplement (doi:10.1039/c9tc06749c), 2020-01-01
Supplement: c9tc06749c1.pdf [file c9tc06749c1.pdf]

## Supporting Information

### **Bio-polysaccharide Electrolyte Gated Photoelectric Synergic Coupled Oxide Neuromorphic Transistor with Pavlovian Activities**

Yan Bo Guo<sup>a, b, c, d</sup>, Li Qiang Zhu<sup>a, b, \*</sup>, Ting Yu Long<sup>a, b, c</sup>, Dong Yun Wan<sup>c</sup>, Zheng Yu Ren<sup>a, b, d</sup>

<sup>a</sup> School of Physical Science and Technology, Ningbo University, Ningbo 315211, Zhejiang, P.R.China

<sup>b</sup> Ningbo Institute of Materials Technology and Engineering, Chinese Academy of Sciences, Ningbo 315201, Zhejiang, P.R.China

<sup>c</sup> School of Material Science & Engineering, Shanghai University, Shanghai 200444, P.R.China

<sup>d</sup> University of Chinese Academy of Sciences, Beijing 100049, P.R.China

---

\* [lqzhu@nimte.ac.cn](mailto:lqzhu@nimte.ac.cn) or [zhuliqiang@nbu.edu.cn](mailto:zhuliqiang@nbu.edu.cn)

**S1. Fourier transform infrared (FTIR) characterization and Atomic force microscopy (AFM) characterization**

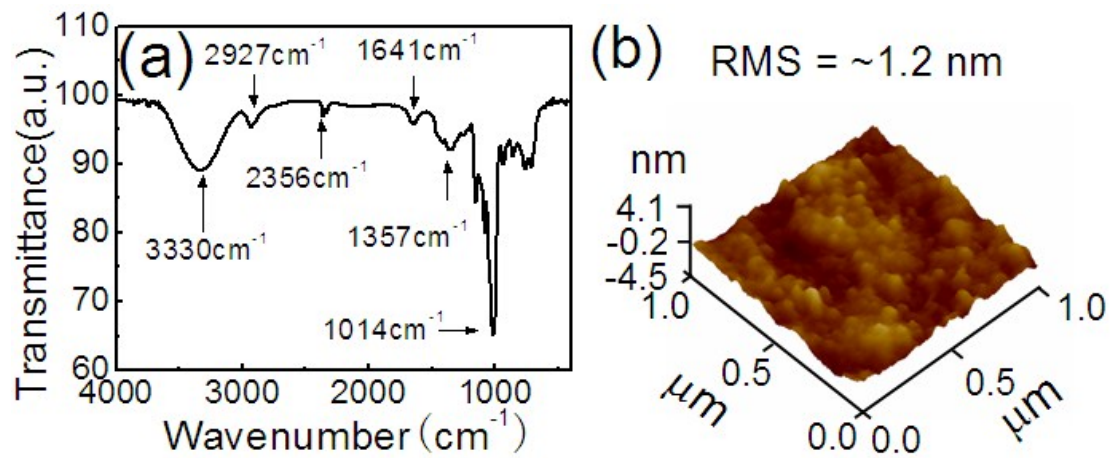

**Figure S1** (a) Fourier transform infrared (FTIR) spectrum of the starch based electrolyte on glass substrate. (b) AFM surface morphology of as obtained starch film.

**S2. Decomposition of starch gated IGZO neuromorphic transistors in DI water.**

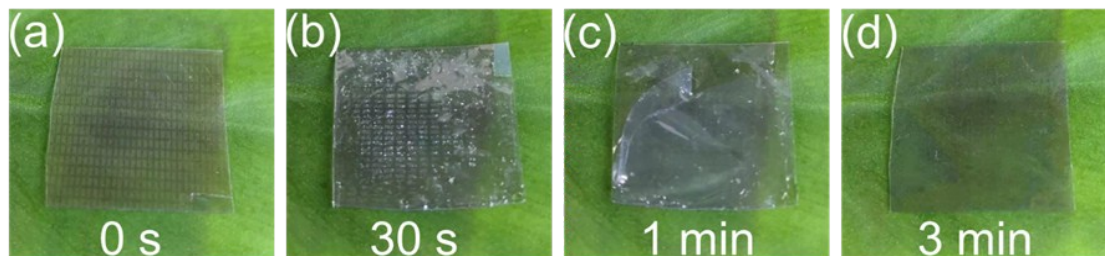

**Figure S2** Decomposition of starch gated IGZO neuromorphic transistors after dropping in deionized water for different times of (a) 0 s, (b) 30 s, (c) 1 min and (d) 3 min.

**S3. Effects of light illumination on electric-double-layer effect and impedance spectroscopy**

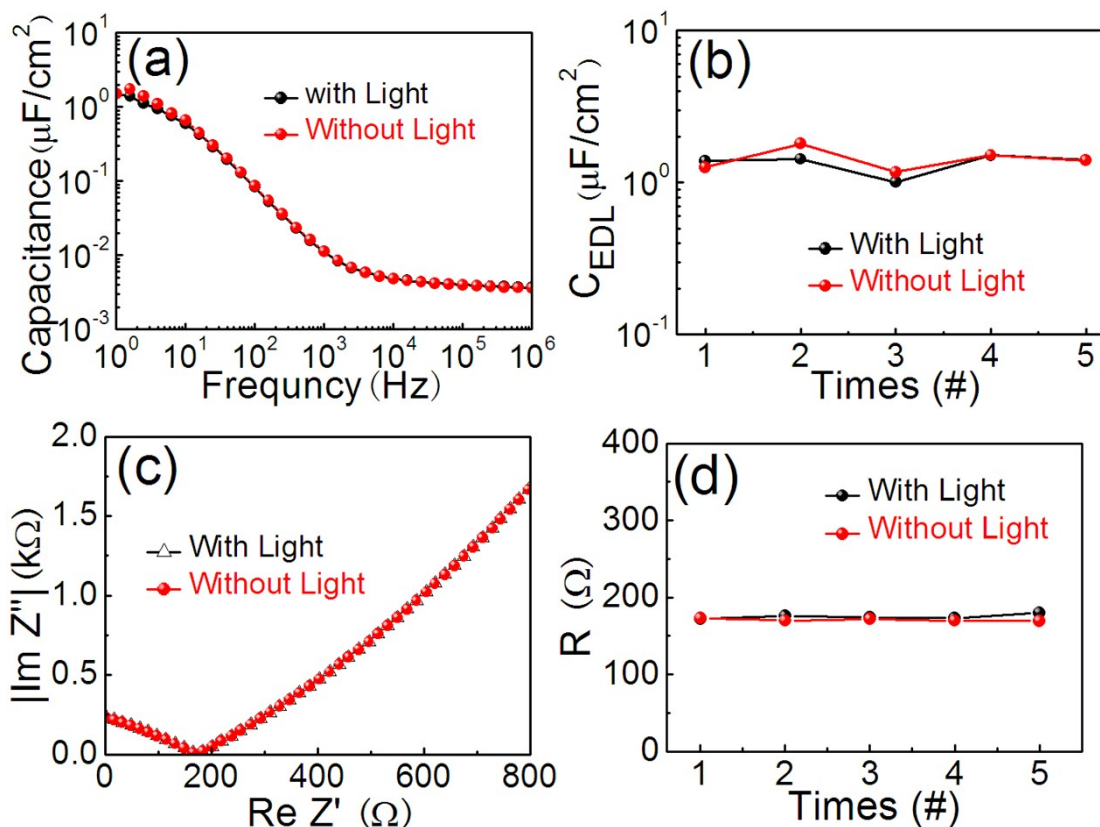

**Figure S3.** (a) Frequency dependent specific capacitance of the starch-based electrolyte film with and without light illumination. Light wavelength: 400 nm. Light intensity:  $\sim 3.5 \text{ mW/cm}^2$ . (b) EDL capacitance ( $C_{\text{EDL}}$ ) of the starch-based electrolyte film tested for five times with and without light illumination. (c) Impedance spectroscopy data of the starch-based electrolyte film with and without light illumination. (d) R value of the starch-based electrolyte film with and without light illumination.

#### S4. Fitting of decayed conductance and the obtained fitting parameters.

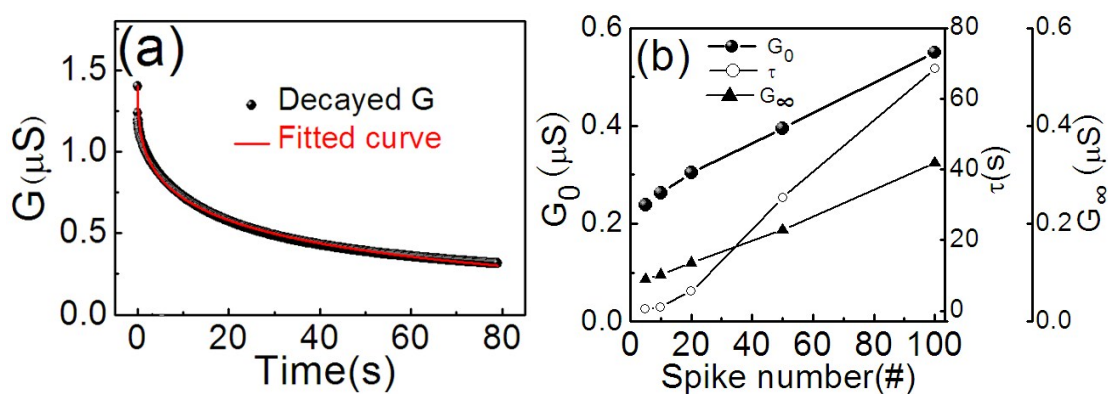

**Figure S4** (a) A typical fitted channel conductance decay curve. (b) Spike number

dependent  $G_0$ ,  $\tau$  and  $G_\infty$  values. Conductance was fitted with a relation:  $G=(G_0-G_\infty)\cdot\exp[-(t/\tau)^\beta]+G_\infty$ .
